# Supplementary material
Source: PubMed Central journal article supplement (PMC7367714)

**A**

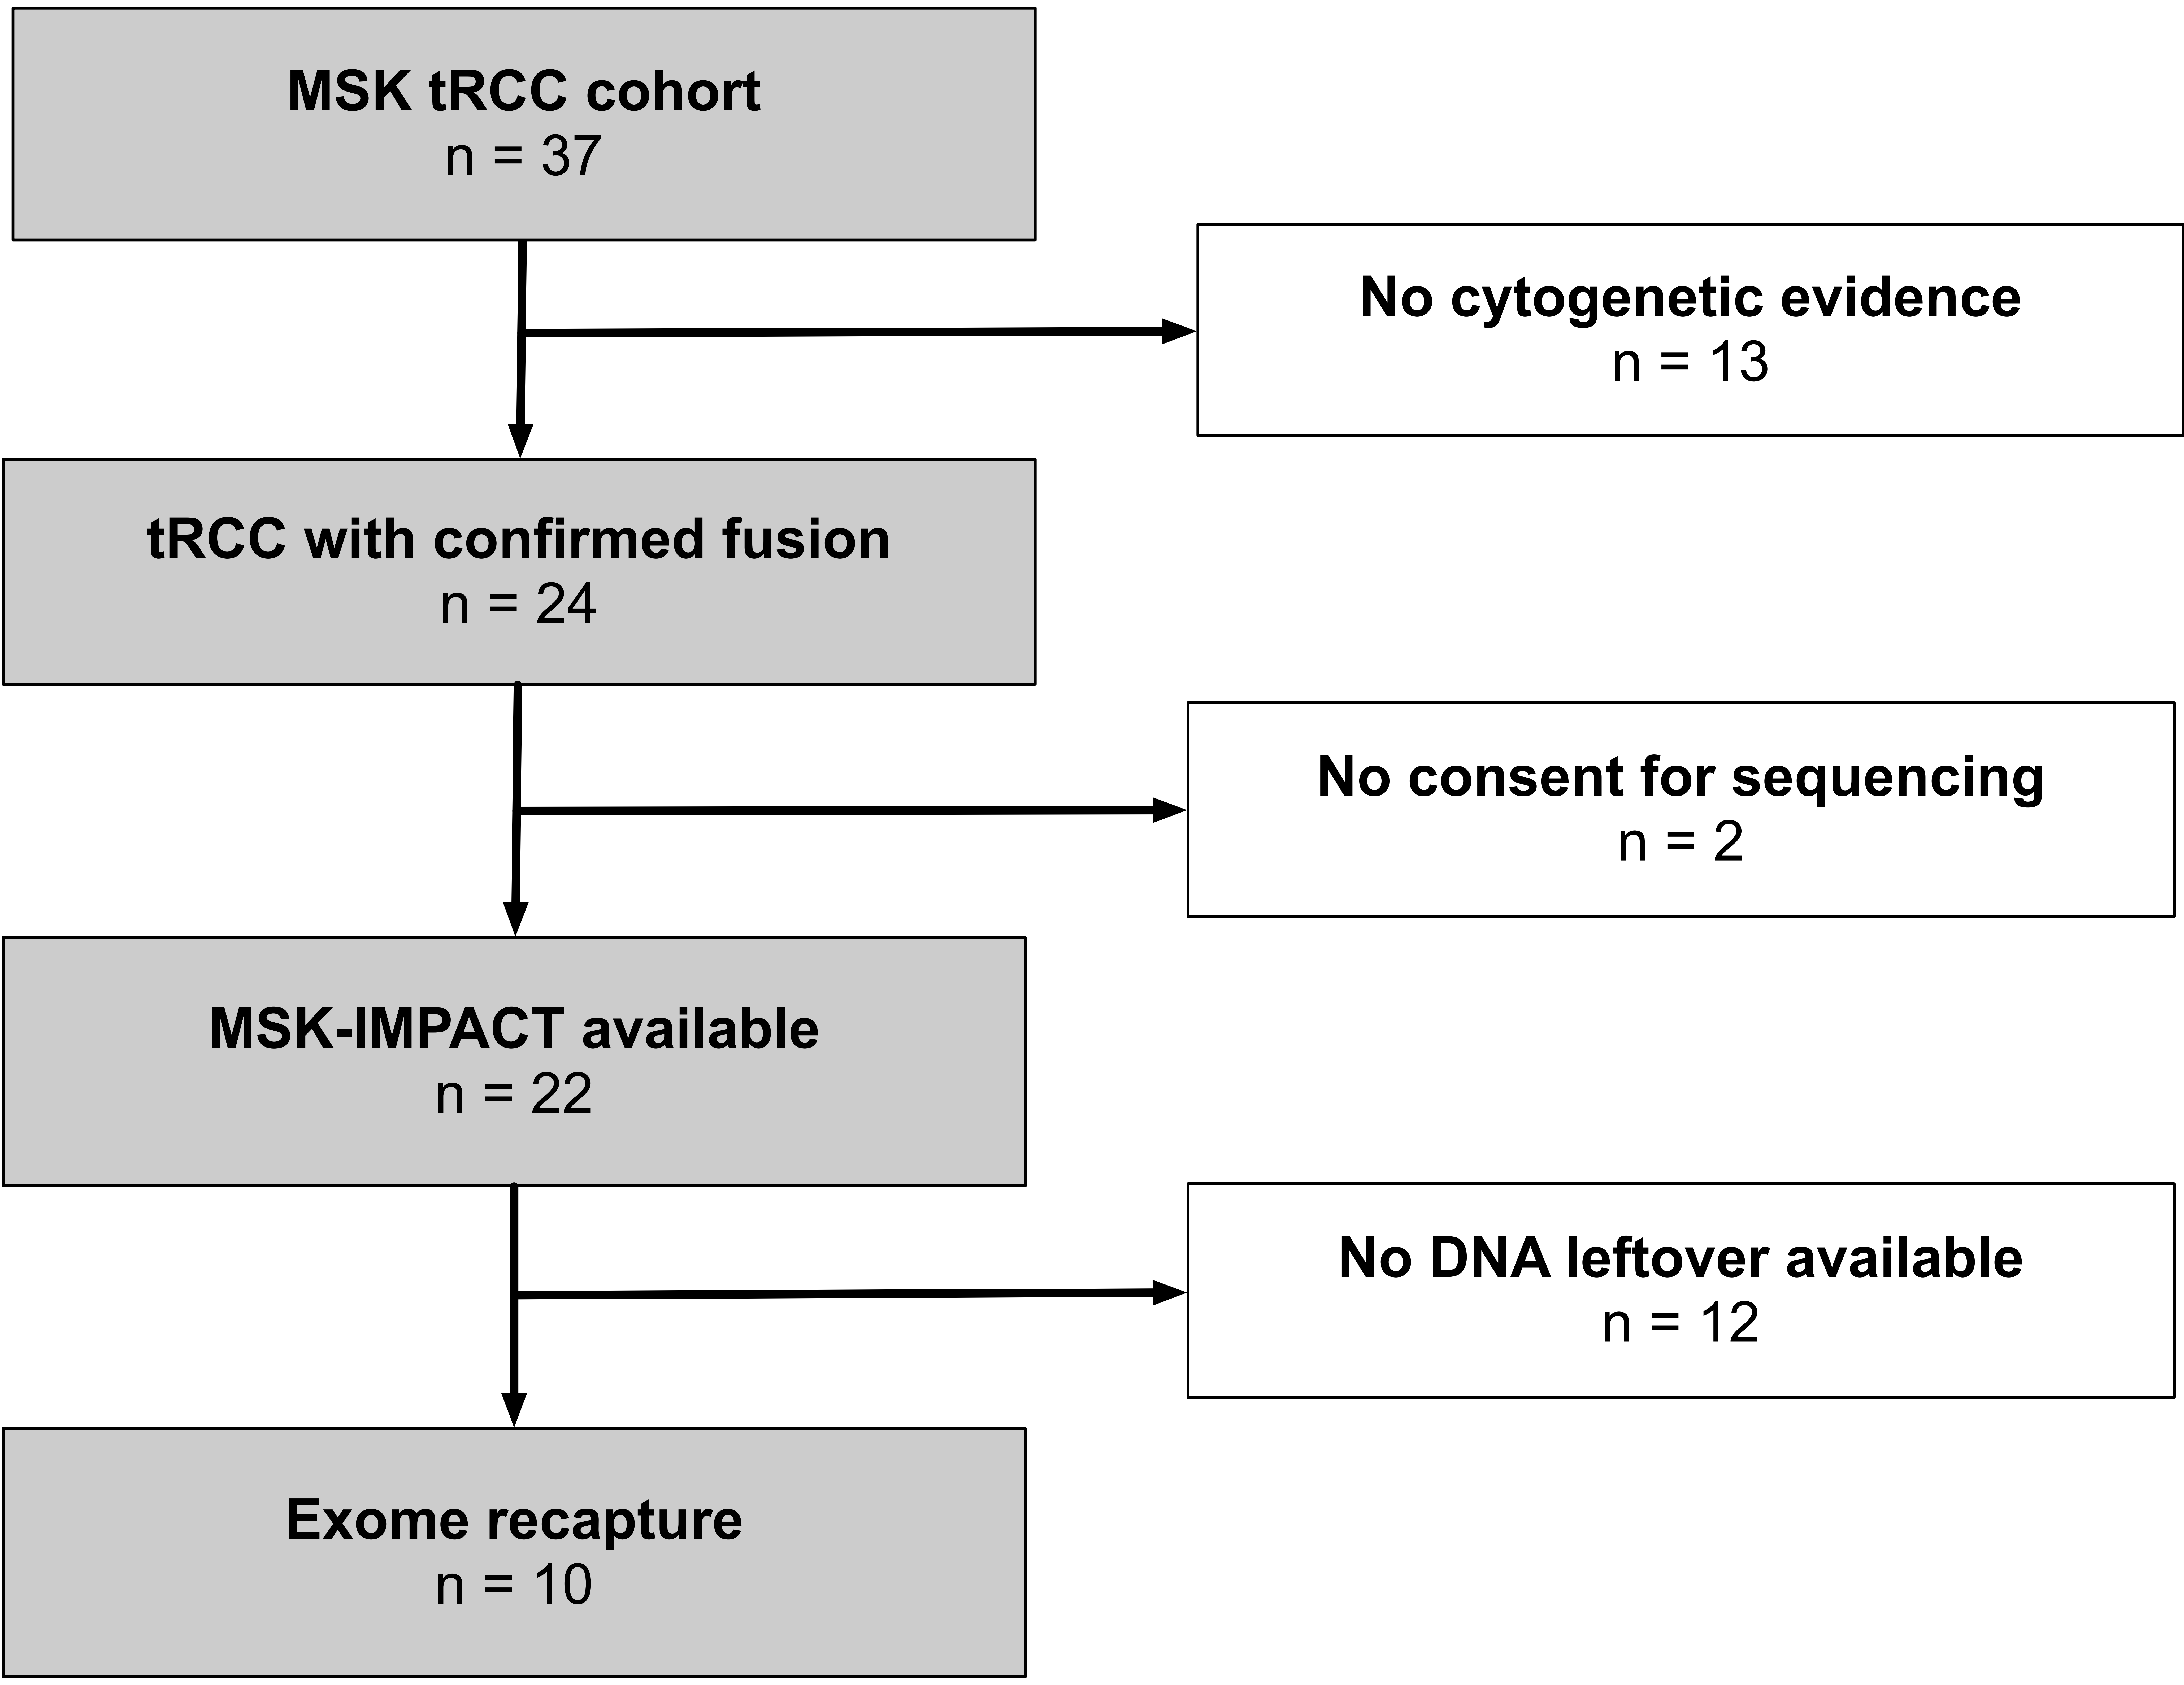

**B**

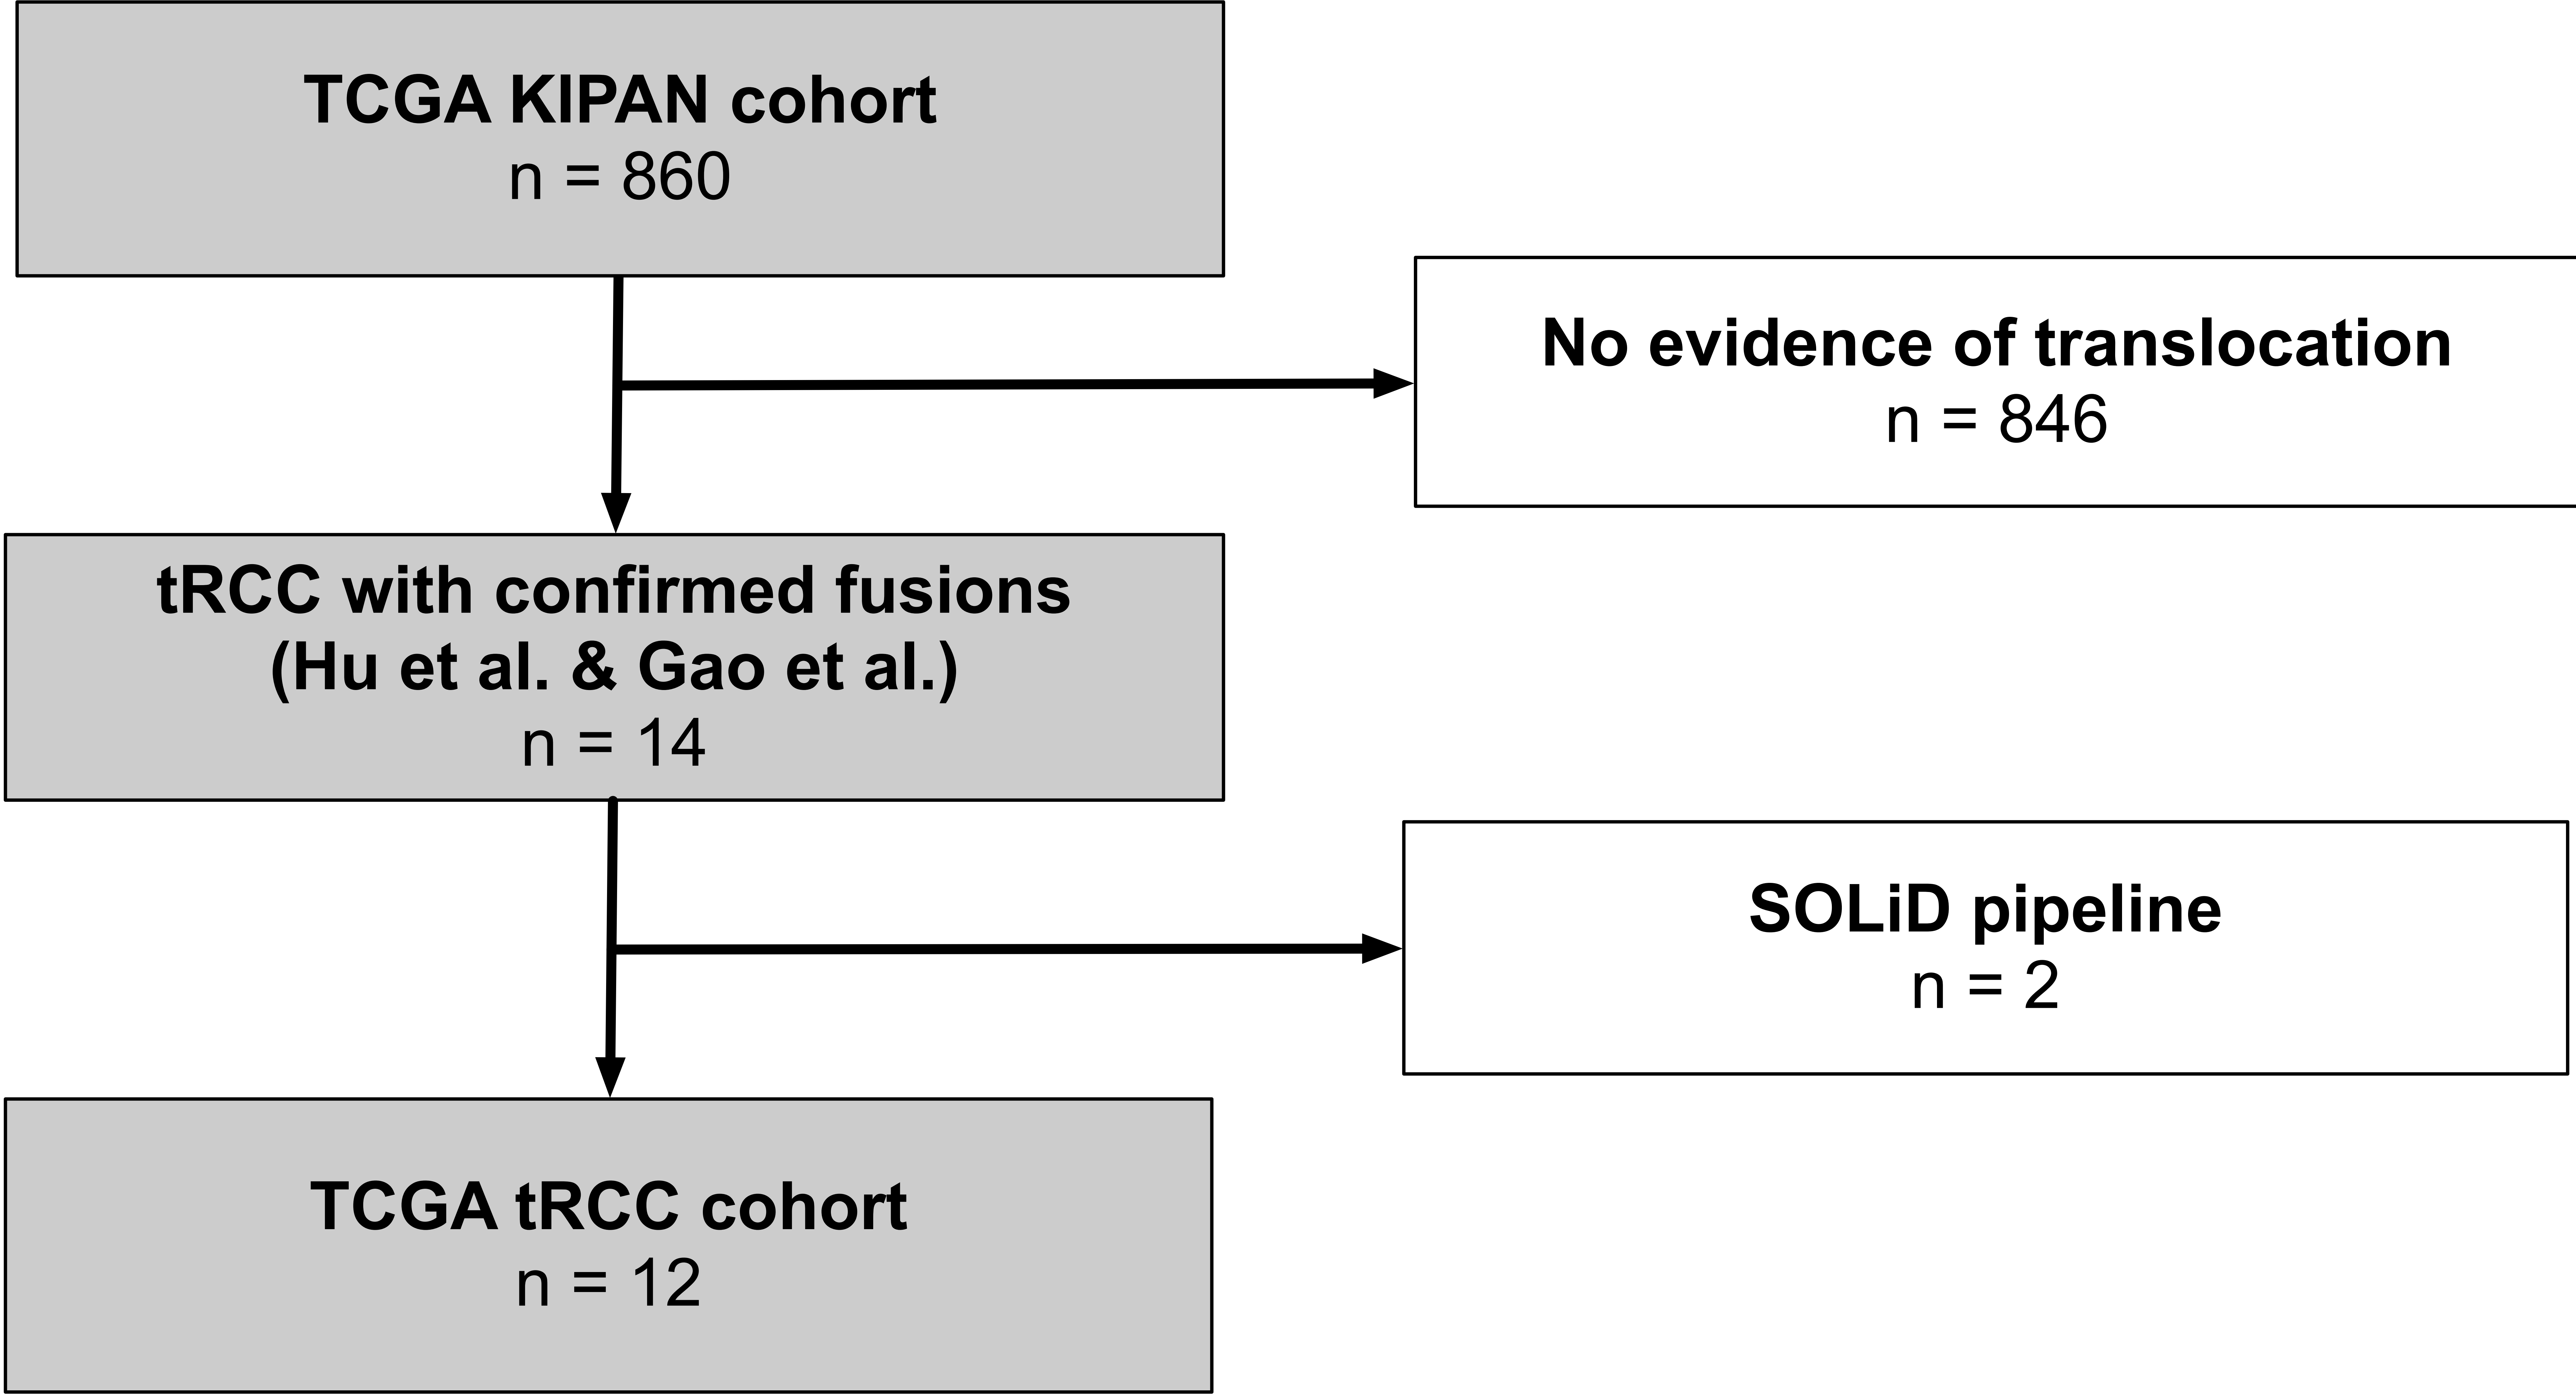

Supplement: NIHMS1580717-supplement-7.pdf [file NIHMS1580717-supplement-7.pdf]

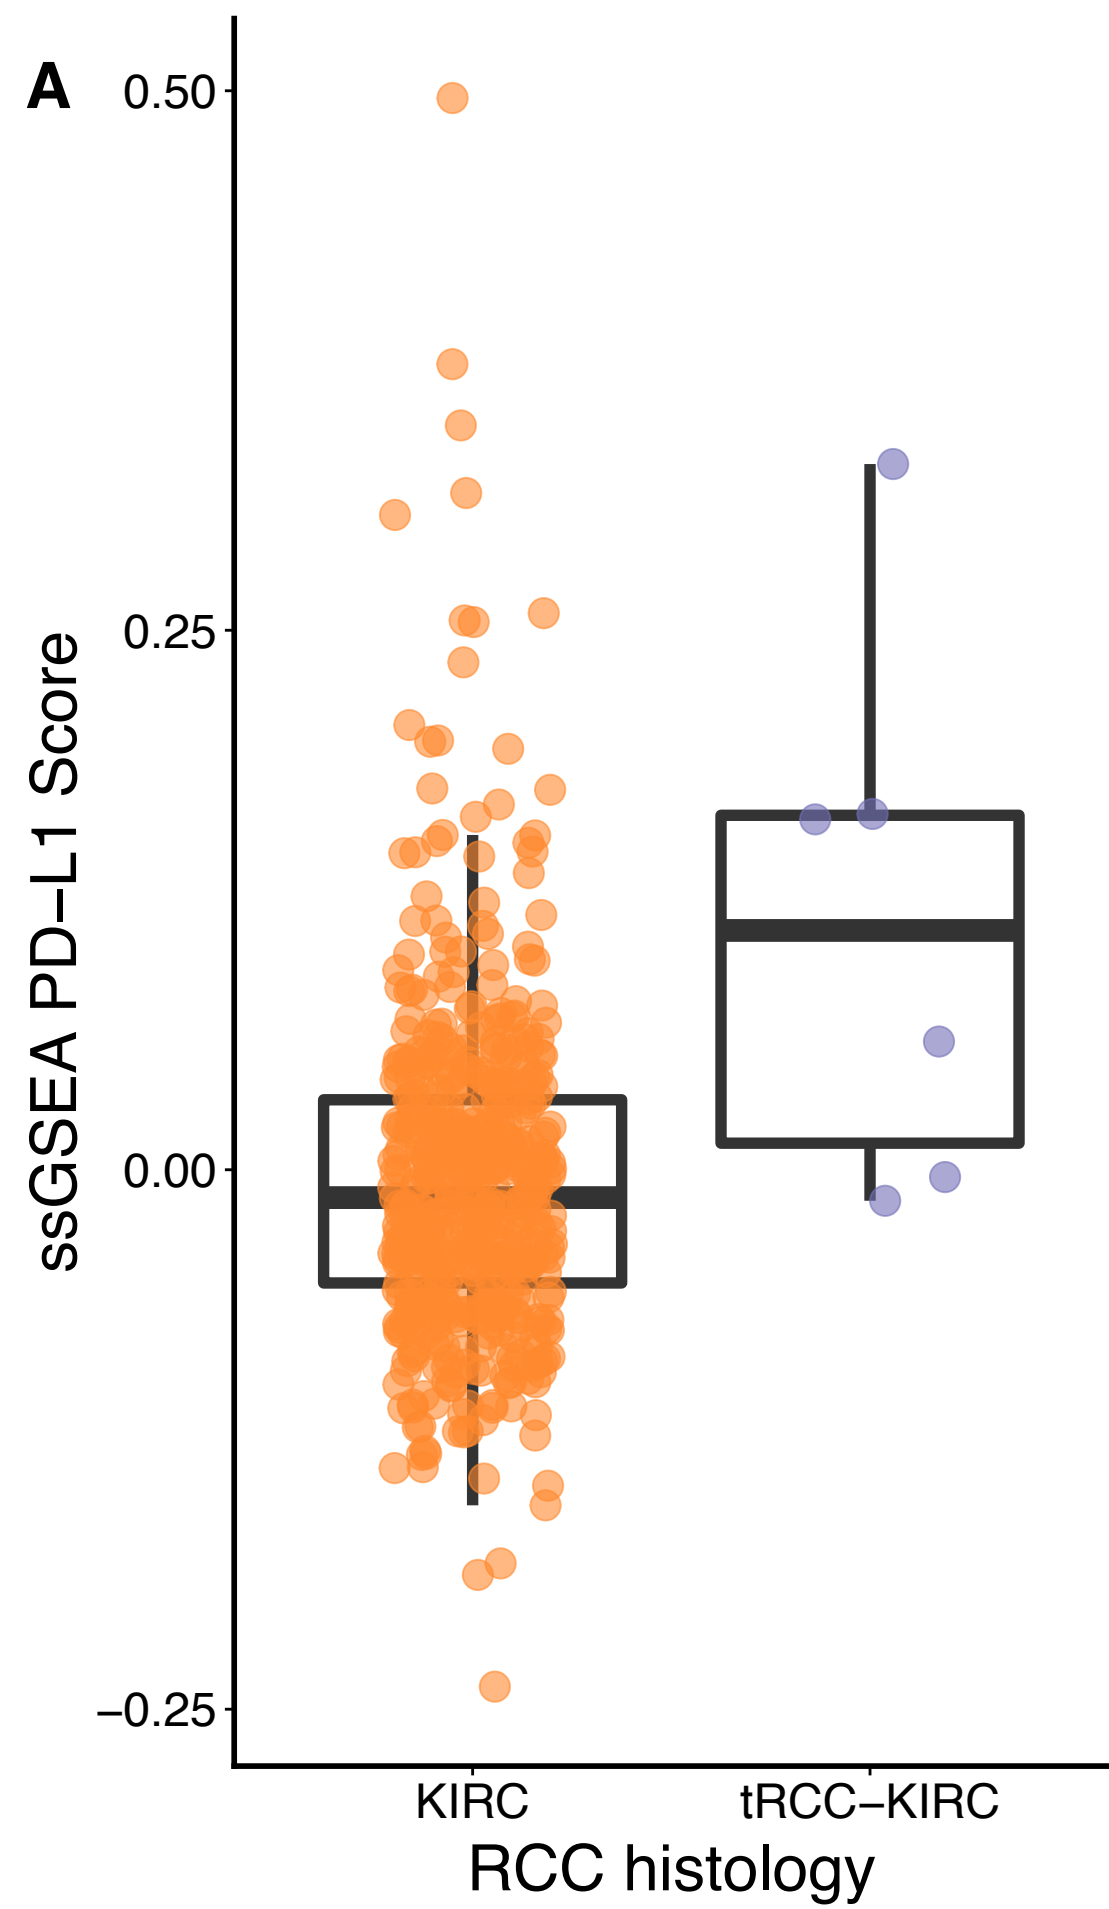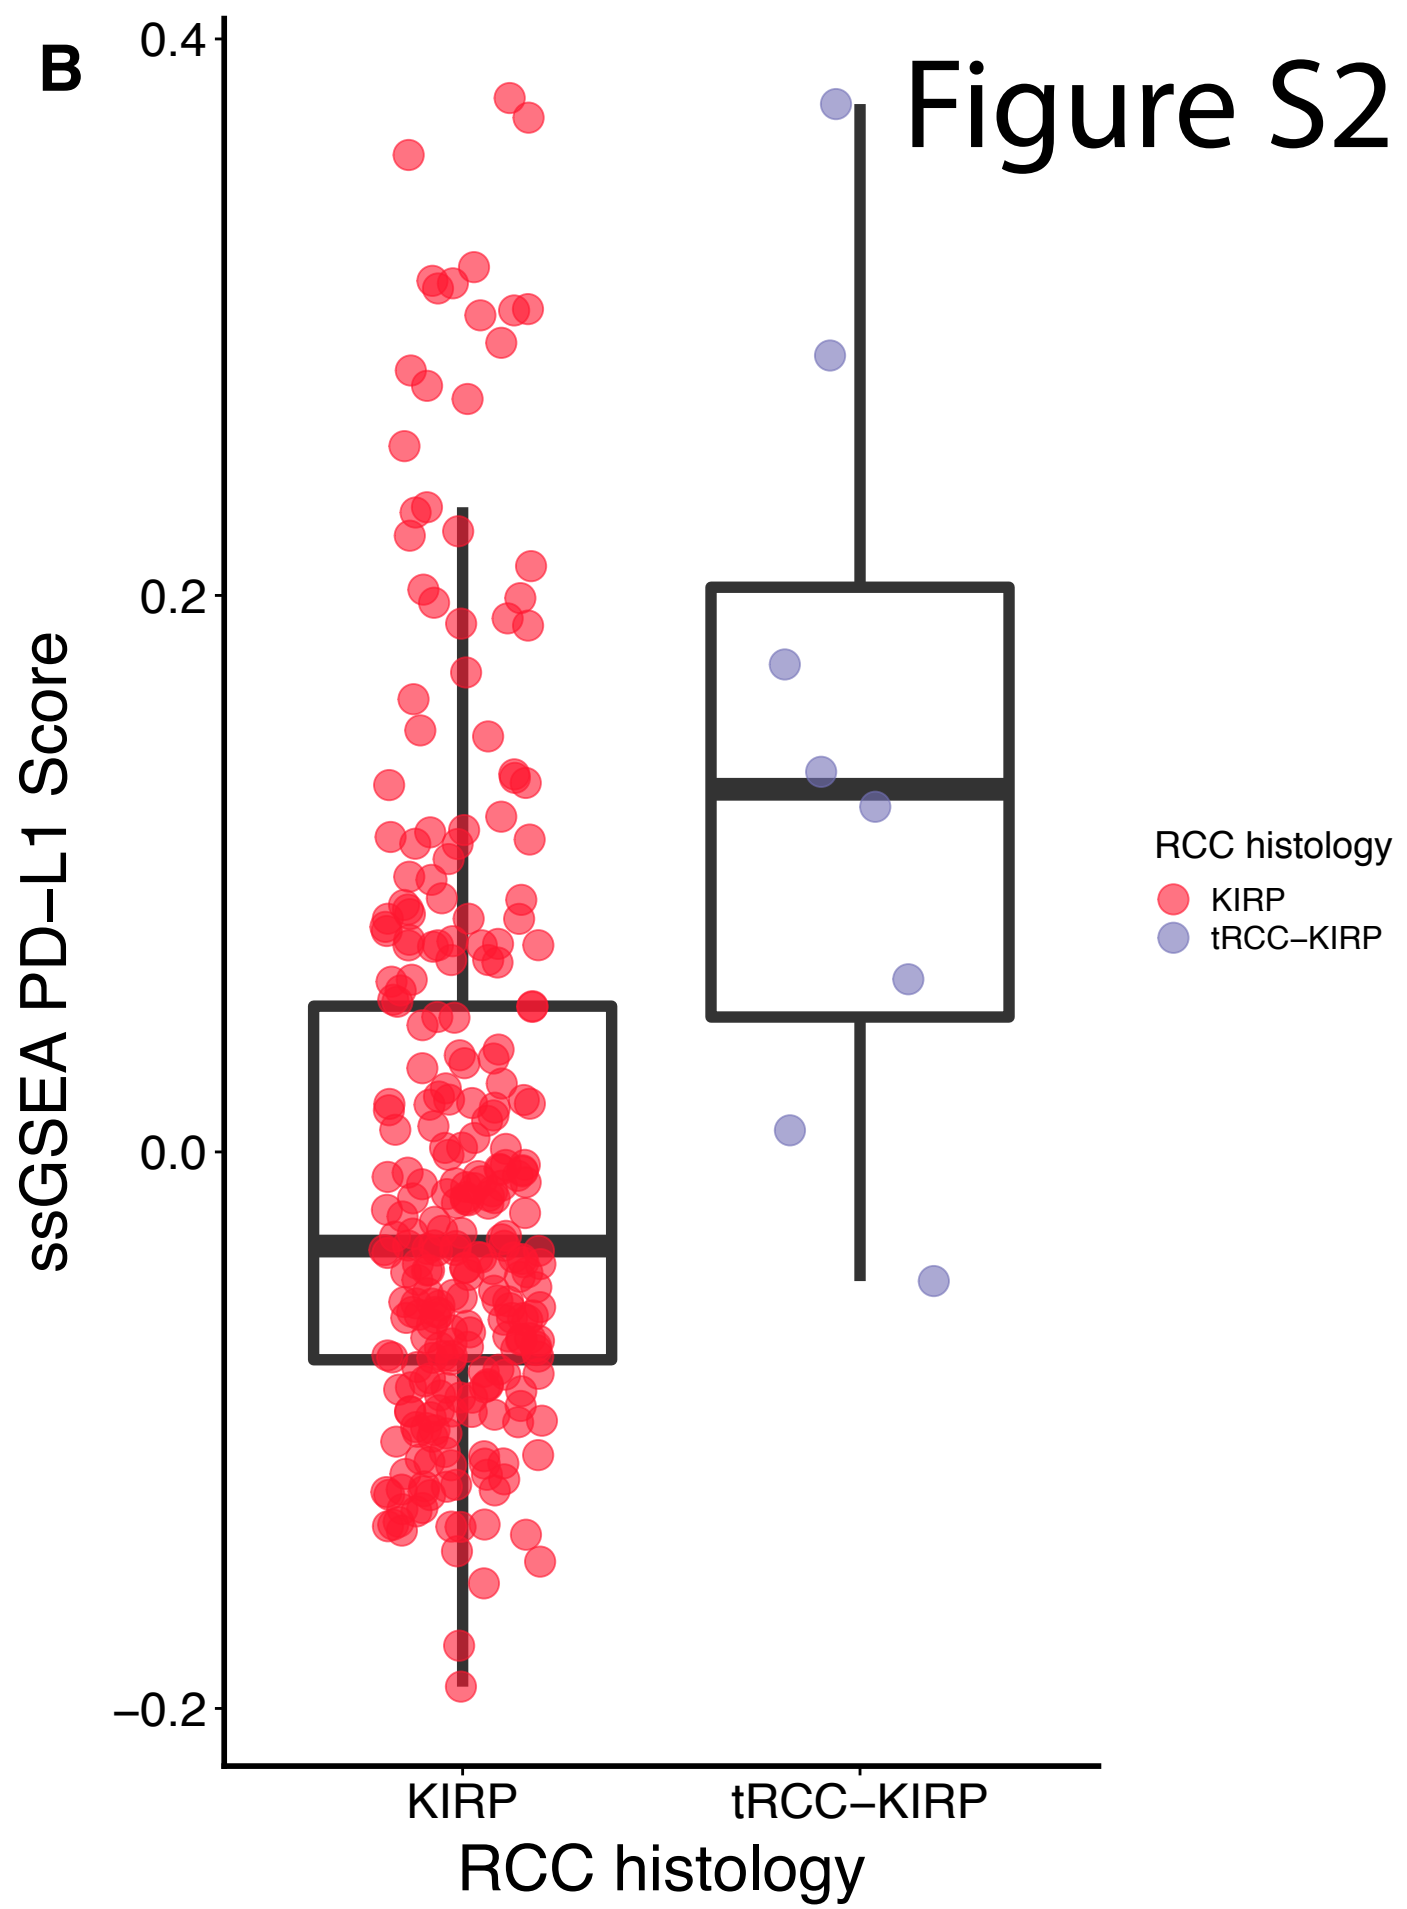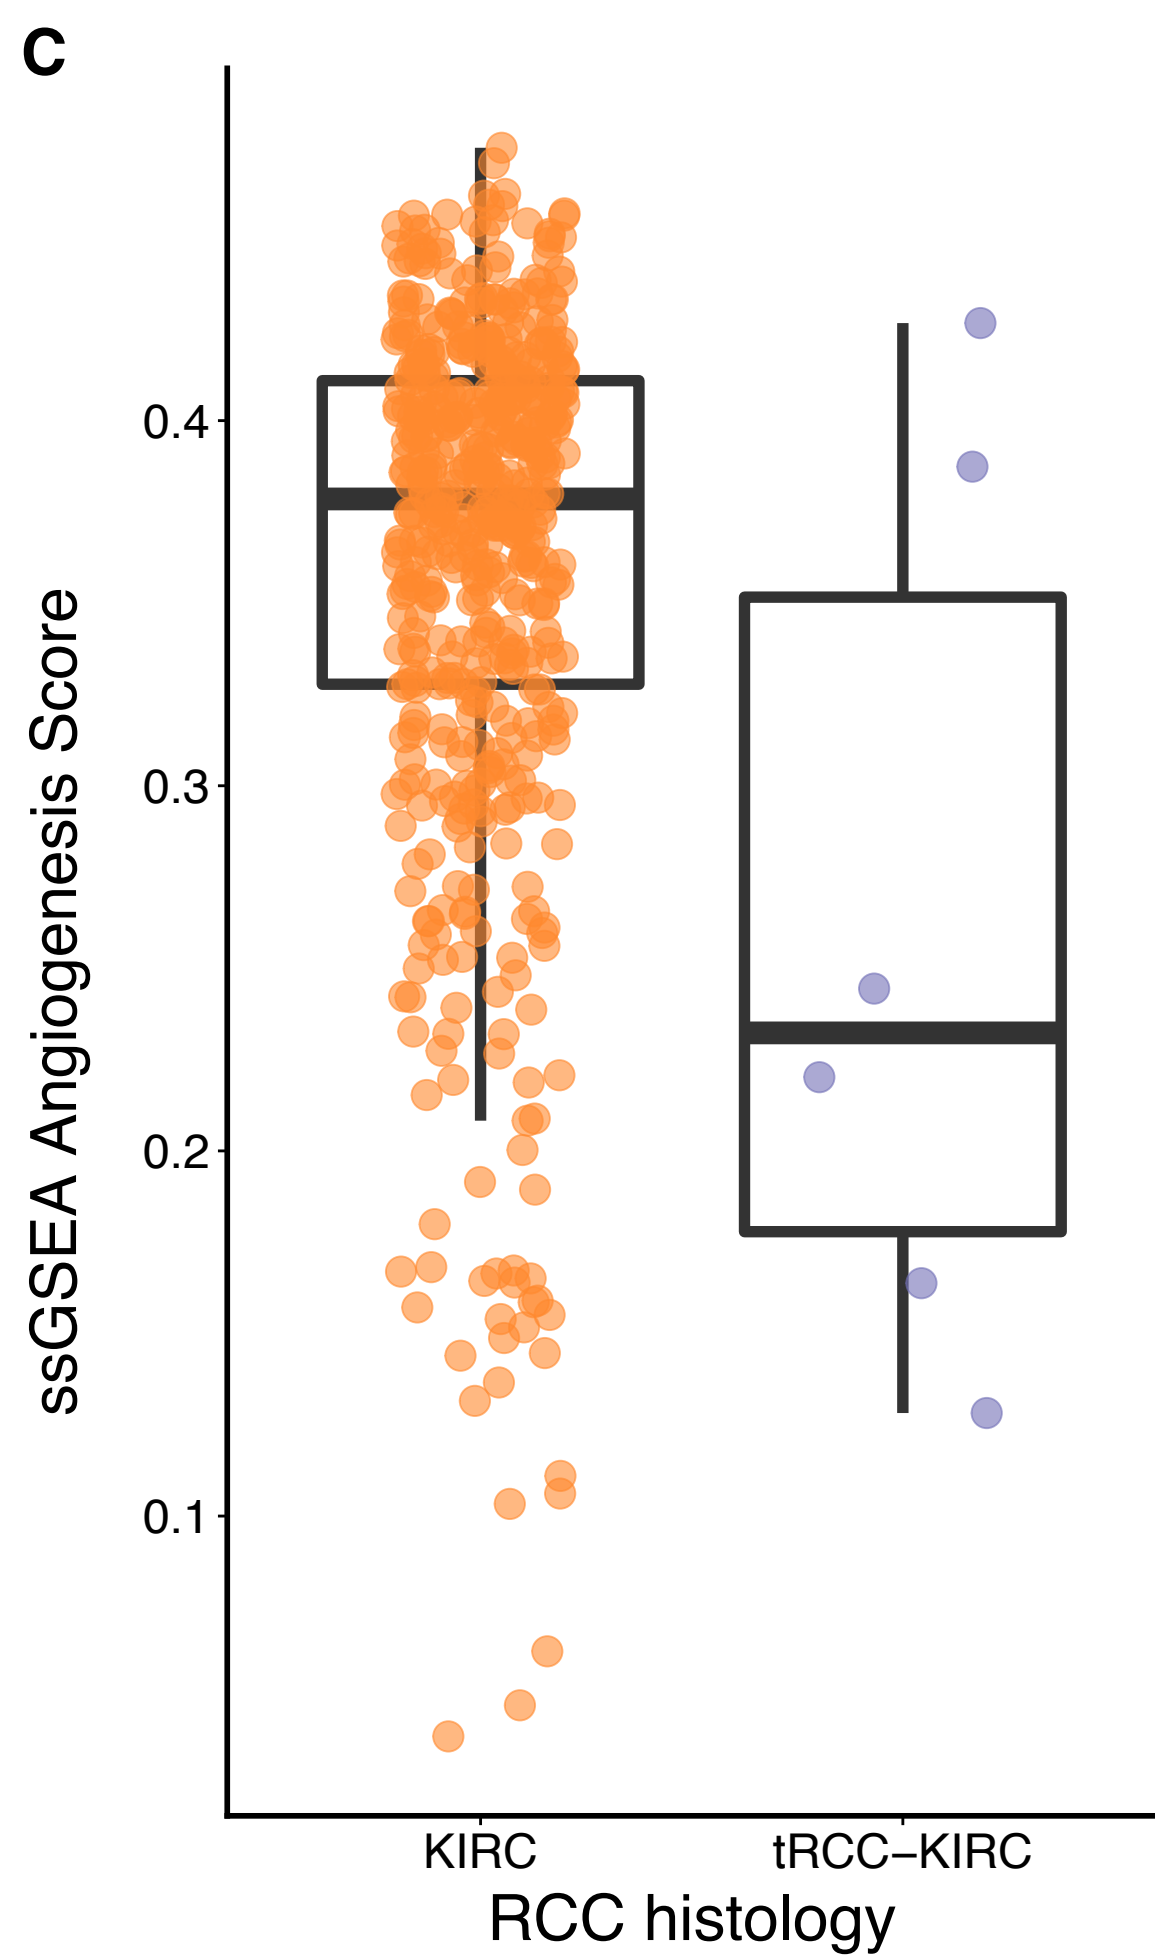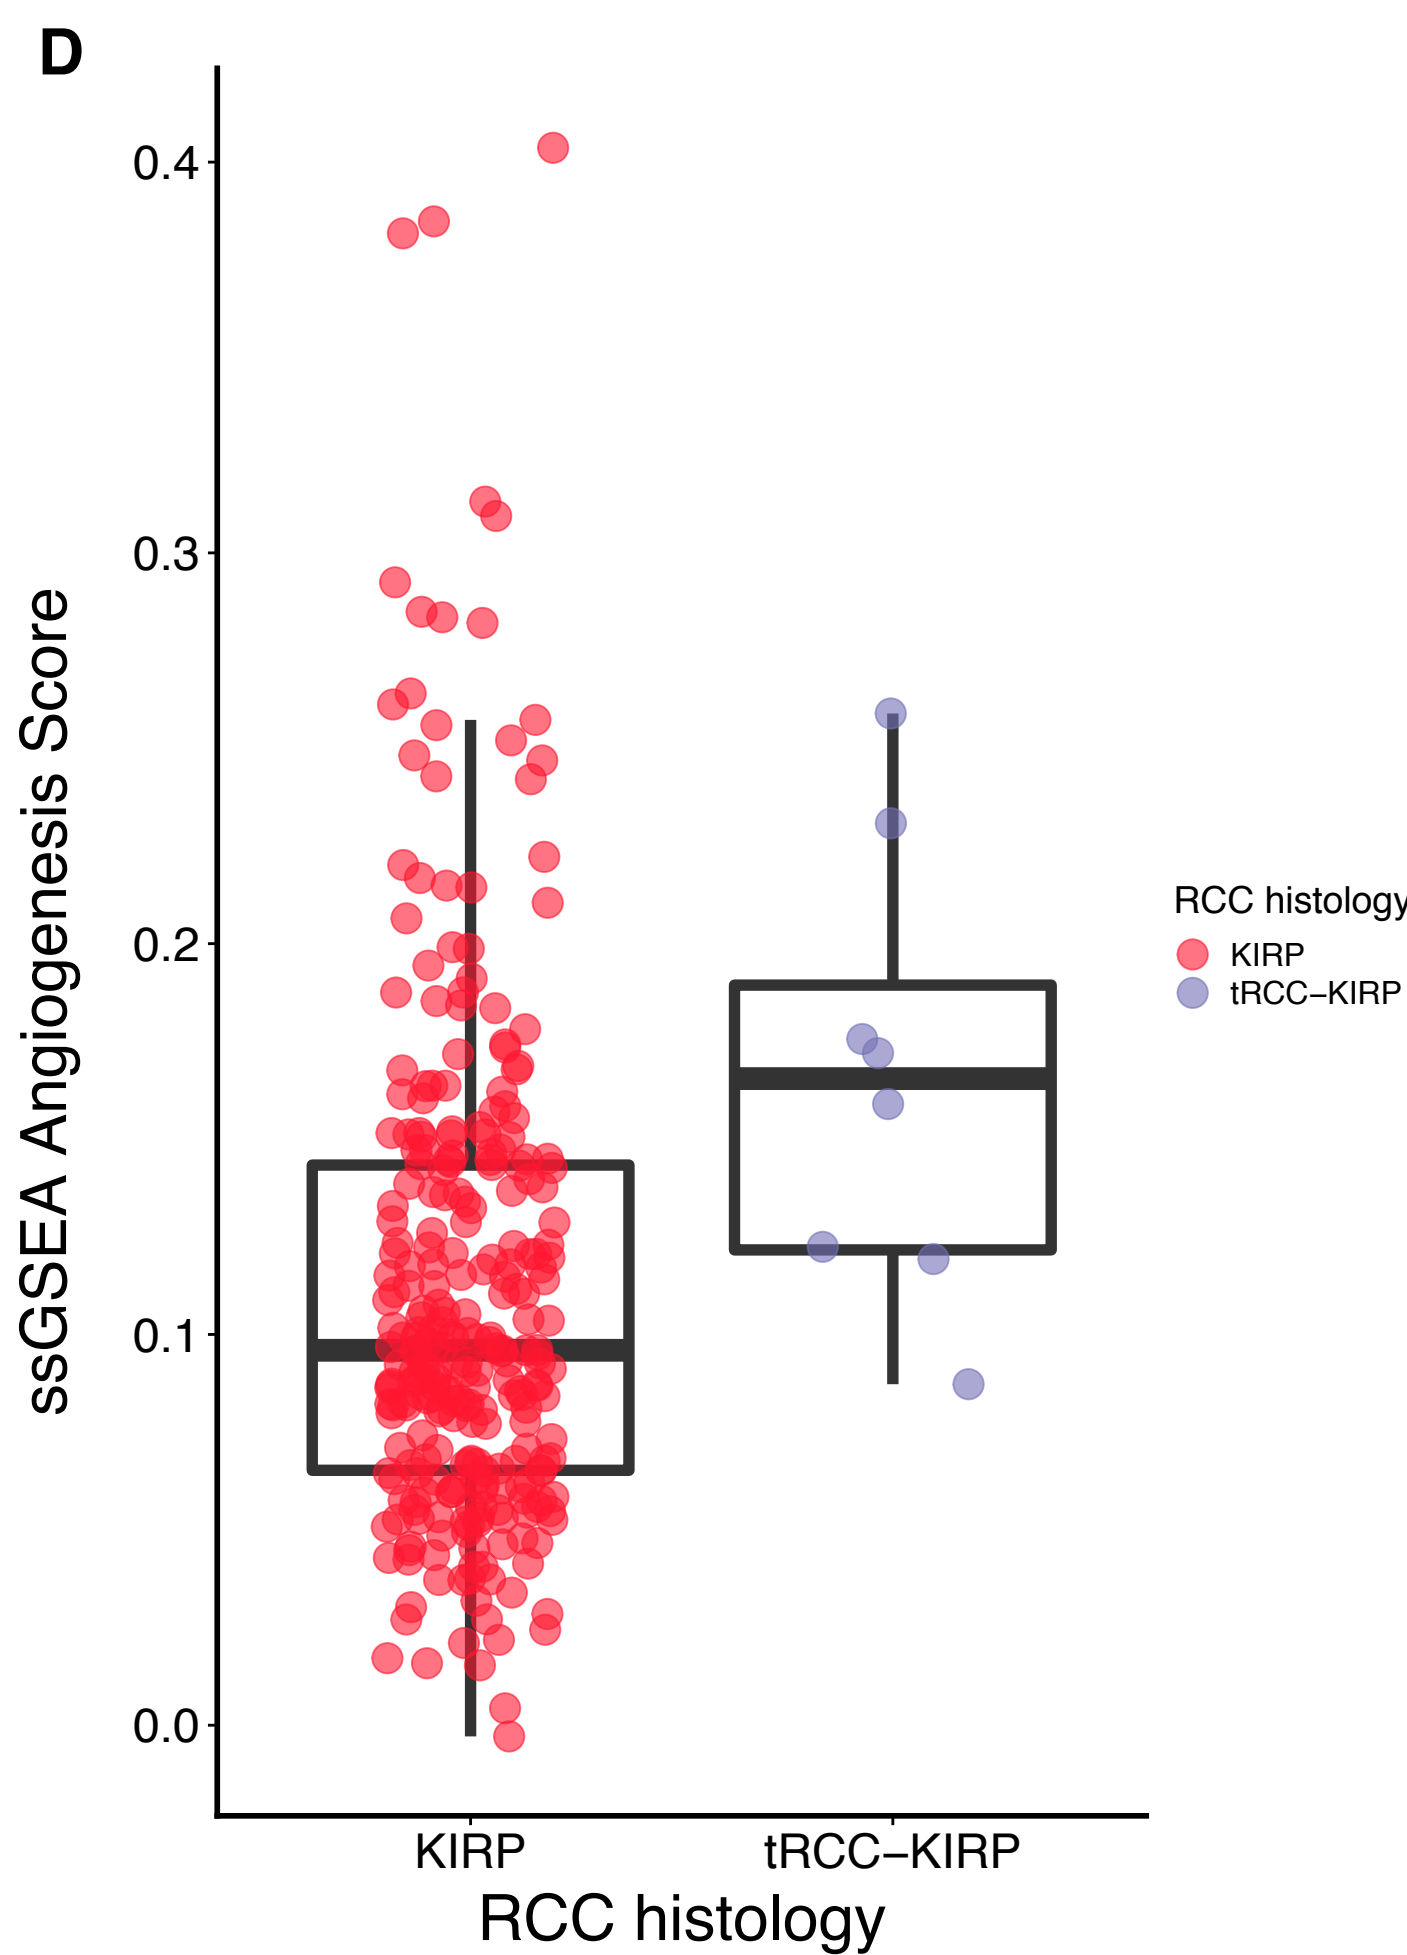

Supplement: NIHMS1580717-supplement-8.pdf [file NIHMS1580717-supplement-8.pdf]
